# Supplementary material for: Supporting Doctoral Students in Crisis
Source: MDPI journal article supplement (doi:10.3390/encyclopedia3040087), 2023-09-28
Supplement: s1 [file s1]

# Supporting doctoral students in crisis: Method

While the basis for this entry is not a rigorous systematic review of the literature in this area, it does stem from a systematic approach, as follows:

- A search of Scopus, Google Scholar, and ERIC was conducted for recent literature (usually 2013 onwards) using the terms 'doctoral + students+ progression or progress or success' and then via alternative, related terms informed by the author's knowledge of the field, such as 'doctoral + supervisor or advisor', 'doctoral student + wellbeing', and 'doctoral + challenges';
- The search was supplemented by the author's own knowledge of the doctoral supervision literature and the works captured in the UKCGE supervision bibliography (UKCGE, 2019);
- Themes were developed by scanning abstracts and the themes reflected in the entry, resulting in an exegesis laid out by source of threat to wellbeing or trigger for crisis, namely personal, professional/occupational and academic;
- Within each, sub-themes were developed from abstracts or executive summaries;
- The author selected key papers, reports and books within each sub-theme, (re-)reading and evaluating the whole corpus at this stage, and using academic judgement to select those with sound methodology and strength of evidence (as relevant) for quotation;
- The whole corpus was crafted into a single narrative for readability purposes;
- Inevitably, there are limitations to comprehensiveness, detail, and probably reliability, given one researcher with limited time and resource.
