# Supplementary material for: Supporting Doctoral Students in Crisis
Source: MDPI journal article supplement (doi:10.3390/encyclopedia3040087), 2023-09-28
Supplement: s1 [file s1]

Archive with 1 entries (1 files):
- encyclopedia-2603598-supplementary.pdf
